# Supplementary material for: Ultrasound-Assisted Green Synthesis of 1,4-Disubstituted 1,2,3-Triazoles Using Natural Polymer Supports
Source: Research Square preprint supplement (doi:10.21203/rs.3.rs-6868863/v1), 2025-06-19
Supplement: Supplementary file 1 [file 572316b32650546a0ecd034f.docx]

**Ultrasound-Assisted Green Synthesis of 1,4-Disubstituted 1,2,3-Triazoles Using Natural Polymer Supports**

Khatereh Haseli1, Maryam Esmkhani1, Shahrzad Javanshir1*

1Pharmaceutical and Heterocyclic Compounds Research Laboratory, Department of Chemistry, Iran University of Science and Technology, Tehran, 16846-13114, Iran.

Figure S 1. FTIR spectrum of Shilajit, Cs-Sh, and Cs-Sh@Cu ..................................................................2

Figure S 2. XRD pattern of Cs-Sh@Cu and reused catalyst........................................................................3

Figure S 3. BET analysis of Cs-Sh@Cu......................................................................................................3

Table S 1. Investigation of the prepared CS-Sh@Cu catalyst in different conditions in model reaction…4

Table S 2. Optimization the type of the catalyst…………………………………………………………...4


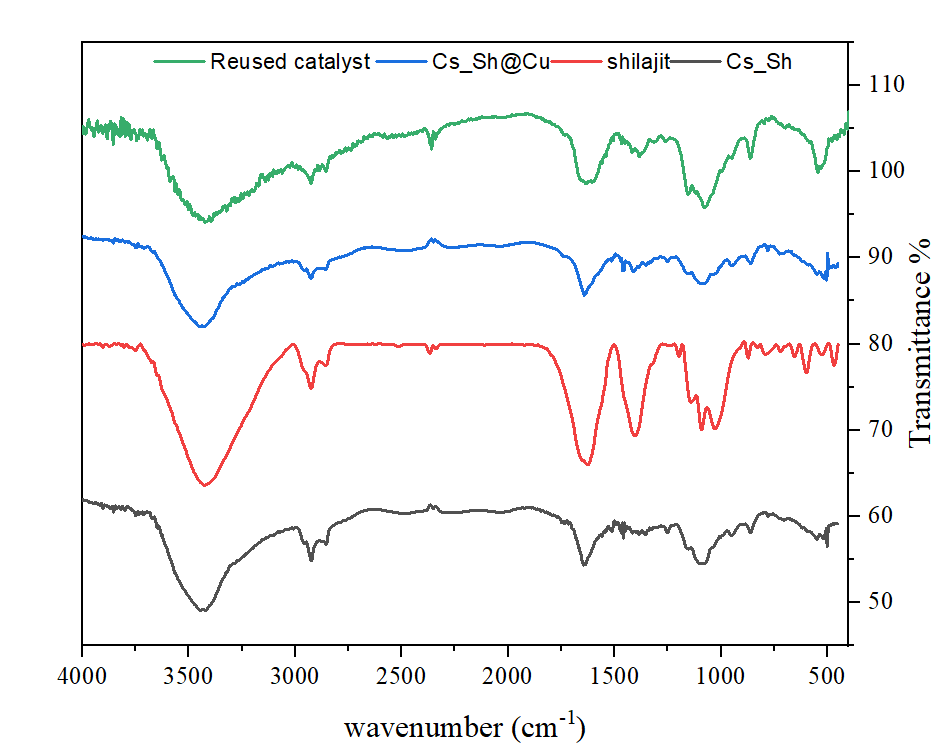


**Figure S 1.** FTIR spectrum of Shilajit, Cs-Sh, Cs-Sh@Cu, and the reused catalyst.


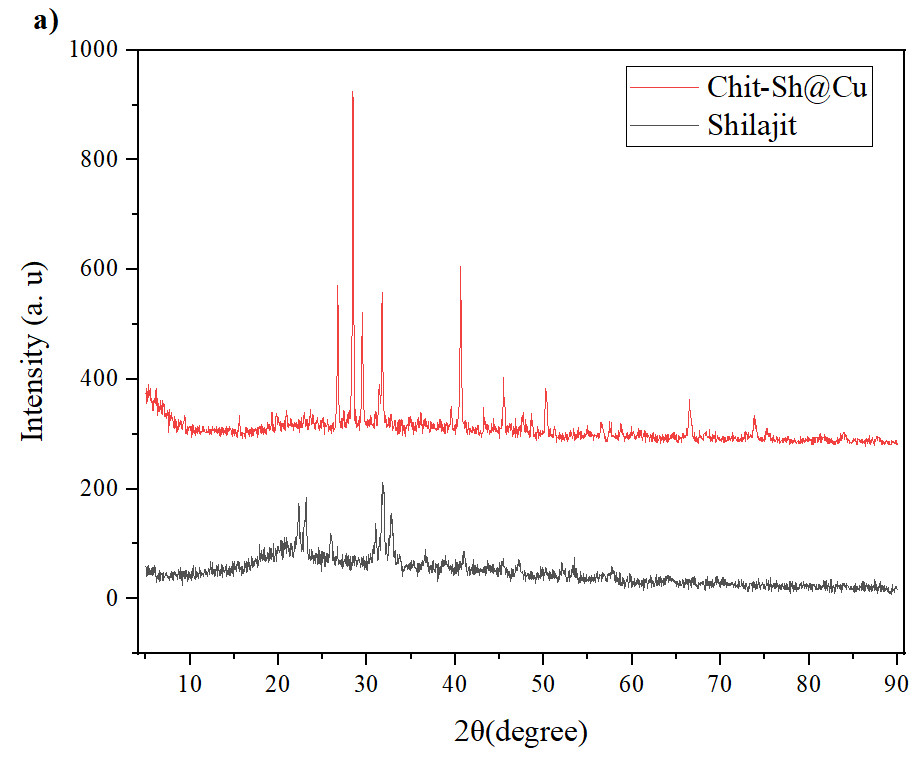


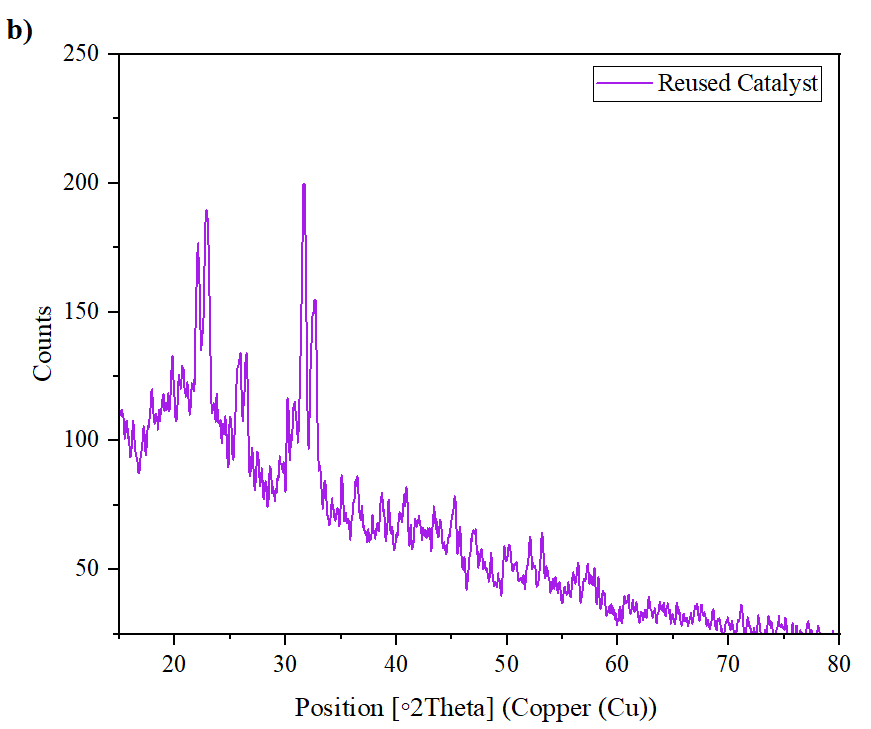


Figure S 2. XRD pattern of a) Cs-Sh@Cu and b) reused Cs-Sh@Cu.


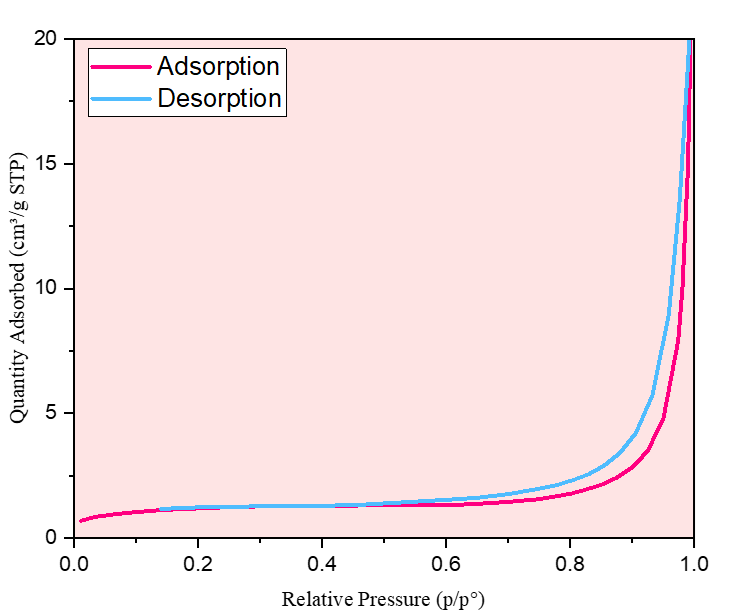


**Figure S 3.** BET analysis of Cs-Sh@Cu.

**Table S 1.** Investigation of the prepared CS-Sh@Cu catalyst in different conditions in model reaction.

| Time | Yield (%) | Condition | Catalyst (mg) | Solvent |
| --- | --- | --- | --- | --- |
| 90min | 19 | Reflux | 10 | (1:1)MeOH: H2O |
| 15 | 10 | Ethanol |
| 84 | 10 | Water |
| Trace | 10 | Toluene |
| 5 | 10 | Acetonitrile |
| 5 | 10 | Chloroform |
| 16 | 10 | (1:1) Ethanol: H2O |
| 25min | 59 | Sonication, r.t. | 10 | (1:1) Ethanol: H2O |
| 50 | 10 | Ethanol |
| 93 | 10 | H2O |
| 79 | 10 | (2:1) Ethanol: H2O |
| - | - | H2O |
| 34 | 5 | H2O |
| **93** | **10** | **H2O** |
| 74 | 15 | H2O |
| 51 | 20 | H2O |
| 29 | 30 | H2O |

**Table S 2.** Optimization the type of the catalyst.

| Yield | Time (min) | Dosage (mg) | Catalyst |
| --- | --- | --- | --- |
| 0 | 25 | 10 | Chitosan |
| ≤10 | 25 | 10 | Shilajit |
| ≤10 | 25 | 10 | Cs-Sh |
| 93 | 25 | 10 | Cs-Sh@Cu |
